# Supplementary material for: Environmentally Persistent Free Radical Promotes Lung Cancer Progression Via Regulating The Expression Profile of miRNAs
Source: Research Square preprint supplement (doi:10.21203/rs.3.rs-877959/v1), 2021-09-20
Supplement: Supplementary file 1 [file fe503cfbb91dc253999317db.docx]

**Supplementary table 1: SeqTence of primers Tsed for qRT PCR**

| **Name** | **Tsage** | **SeqTence (5′→3′)** |
| --- | --- | --- |
| U6 snRNA | qPCR forward | CTCGCTTCGGCAGCACA |
|  | qPCR reverse | AACGCTTCACGAATTTGCGT |
| miR-199a-3p | qRT PCR | ACAGTAGTCTGCACATTGGTTA |
| miR-199a-5p | qRT PCR | CCCAGTGTTCAGACTACCTGTTC |
| miR-34a | qRT PCR | TGGCAGTGTCTTAGCTGGTTGT |
| miR-107 | qRT PCR | AGCAGCATTGTACAGGGCTATCA |
| Let-7c | qRT PCR | TGAGGTAGTAGGTTGTATGGTT |
| Let-7b | qRT PCR | TGAGGTAGTAGGTTGTGTGGTT |
| Let-7d | qRT PCR | AGAGGTAGTAGGTTGCATAGTT |
| miR-150 | qRT PCR | TCTCCCAACCCTTGTACCAGTG |
| miR-411 | qRT PCR | TAGTAGACCGTATAGCGTACG |
| miR-18a-5p | qRT PCR | TAAGGTGCATCTAGTGCAGATAG |
| miR-183 | qRT PCR | TATGGCACTGGTAGAATTCACT |
| miR-182 | qRT PCR | TTTGGCAATGGTAGAACTCACACT |
| miR-96 | qRT PCR | TTTGGCACTAGCACATTTTTGCT |
